# Supplementary material
Source: PubMed Central journal article supplement (PMC1458678)

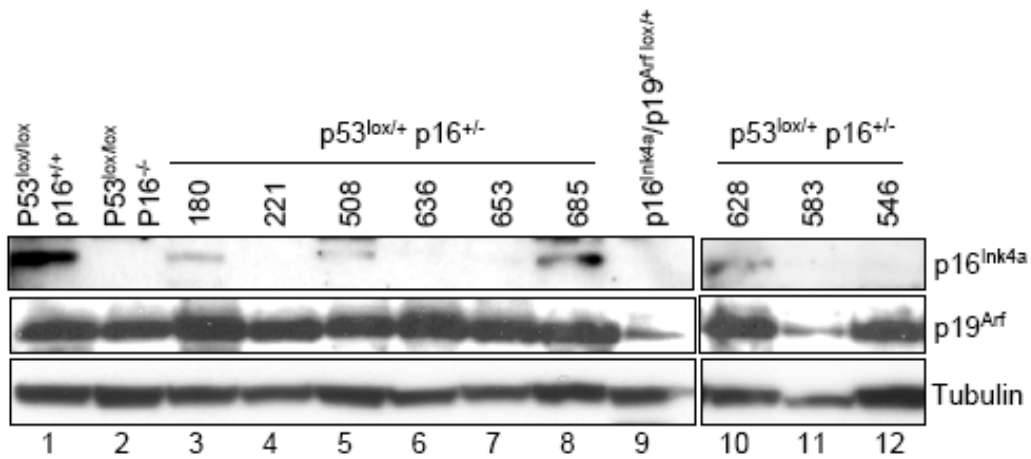

Supplement: pnas_0601273103_1.pdf [file pnas_0601273103_1.pdf]

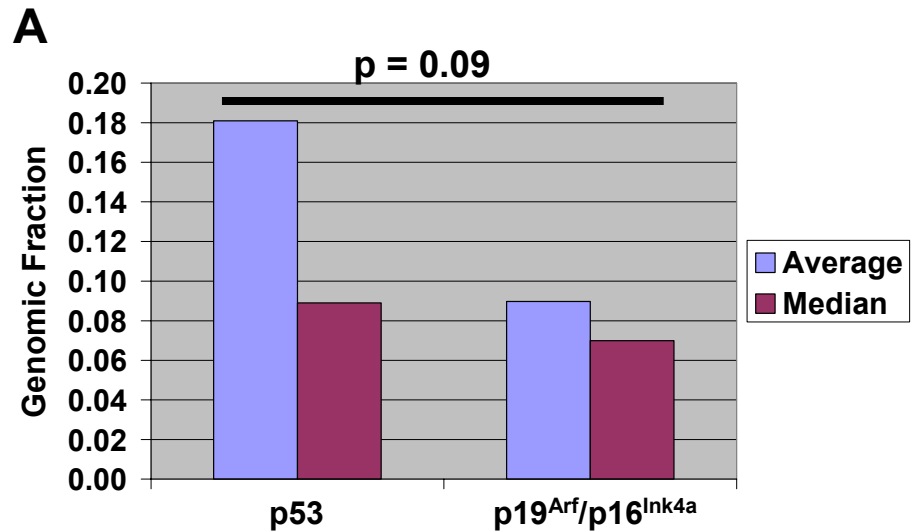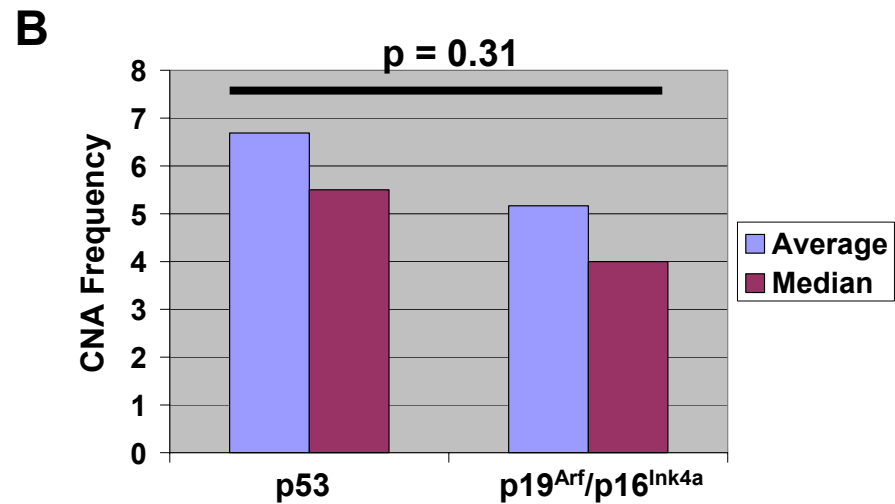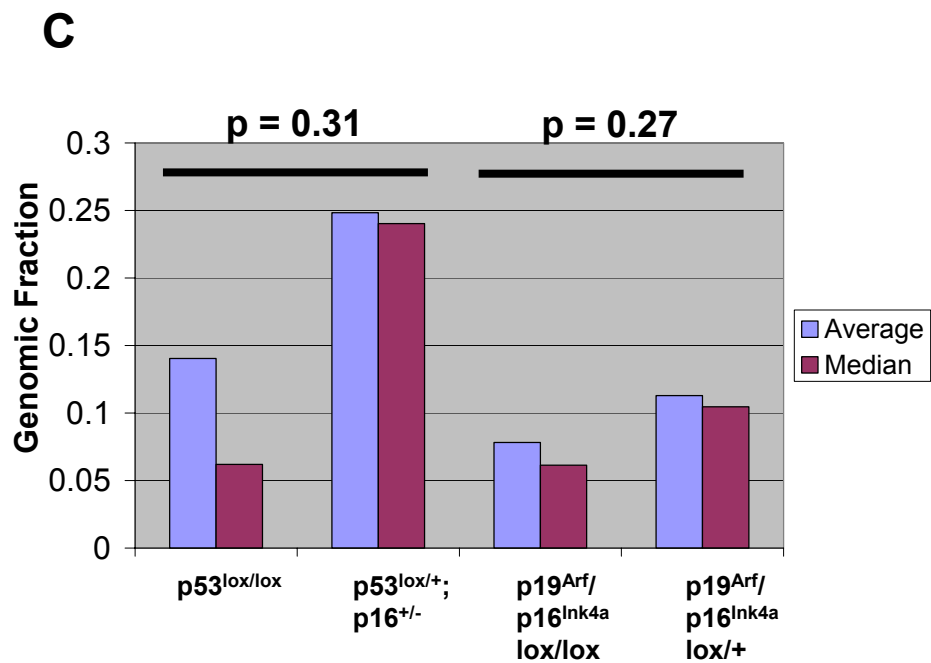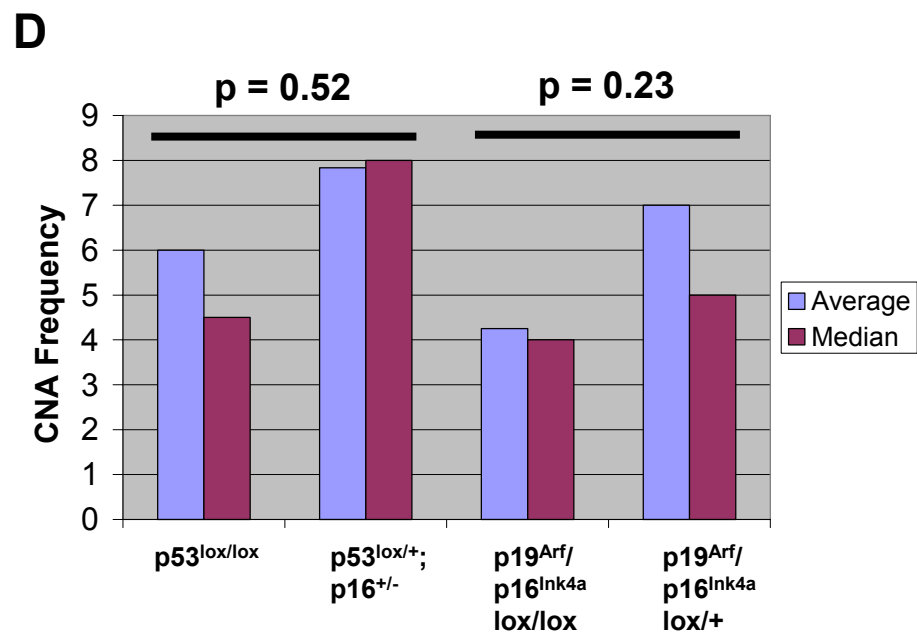

Supplement: pnas_0601273103_2.pdf [file pnas_0601273103_2.pdf]

**A**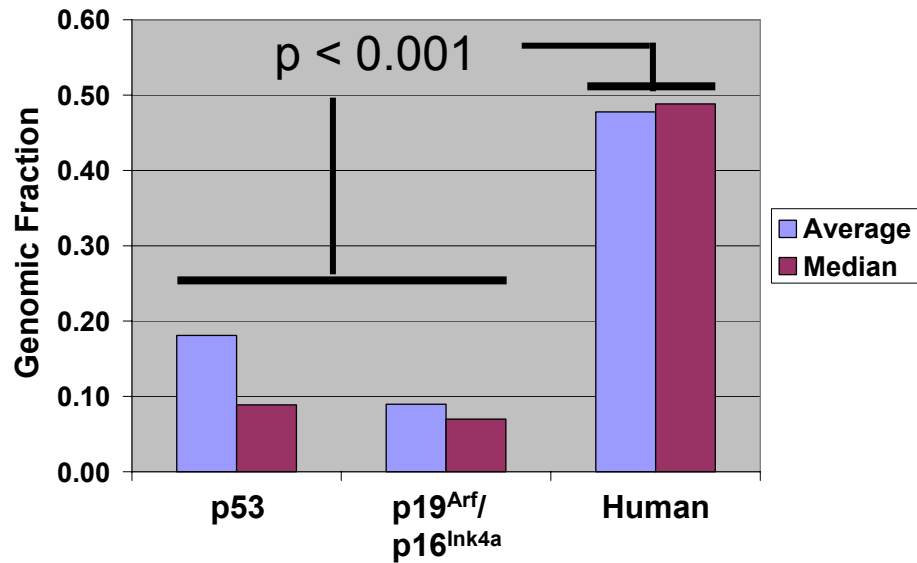**B**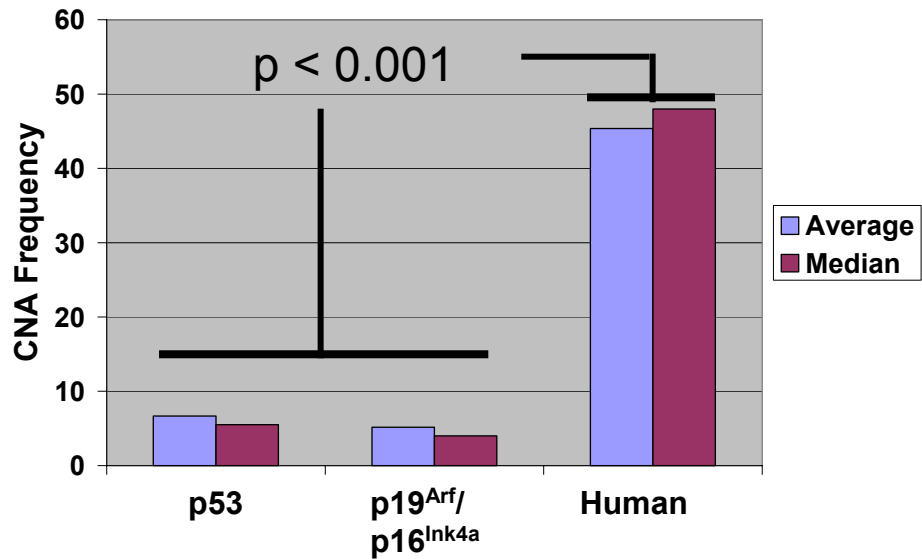

Supplement: pnas_0601273103_3.pdf [file pnas_0601273103_3.pdf]

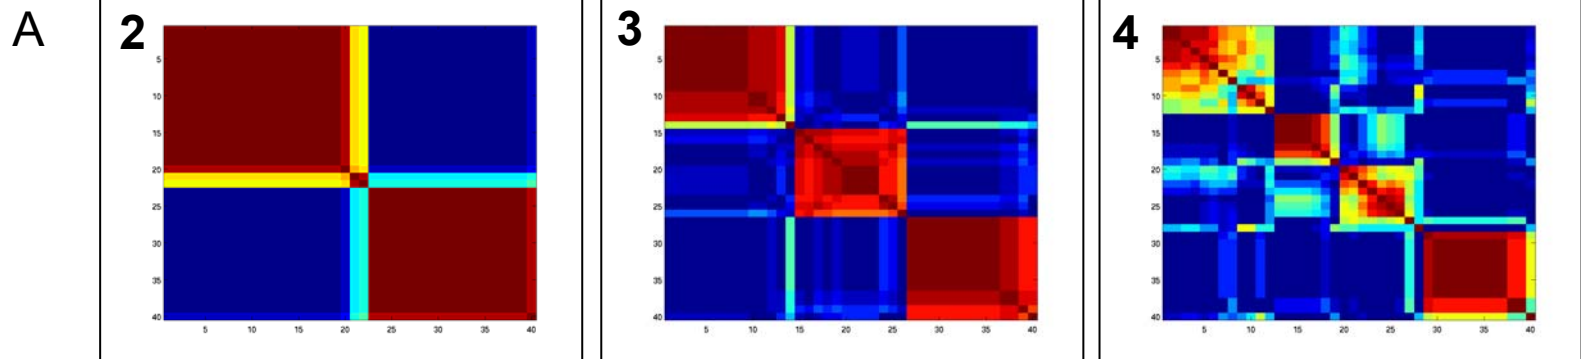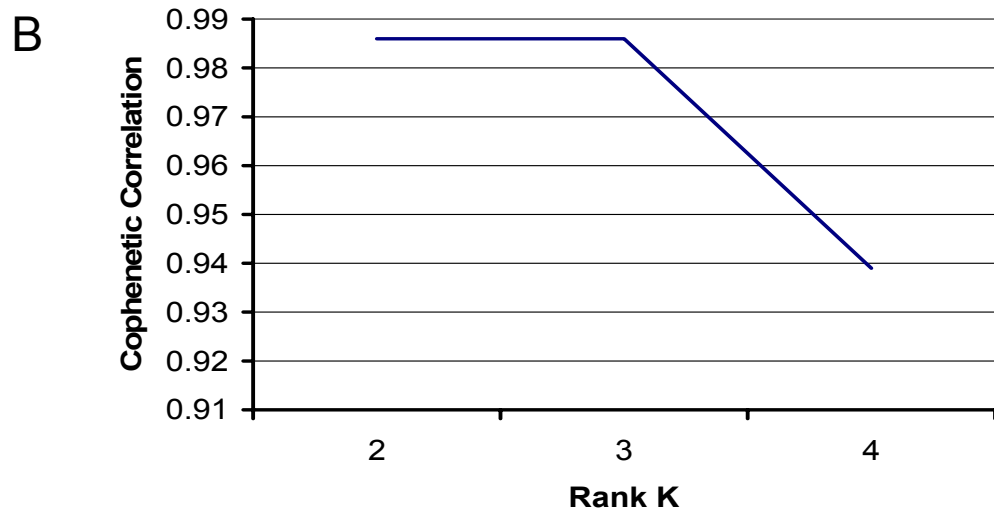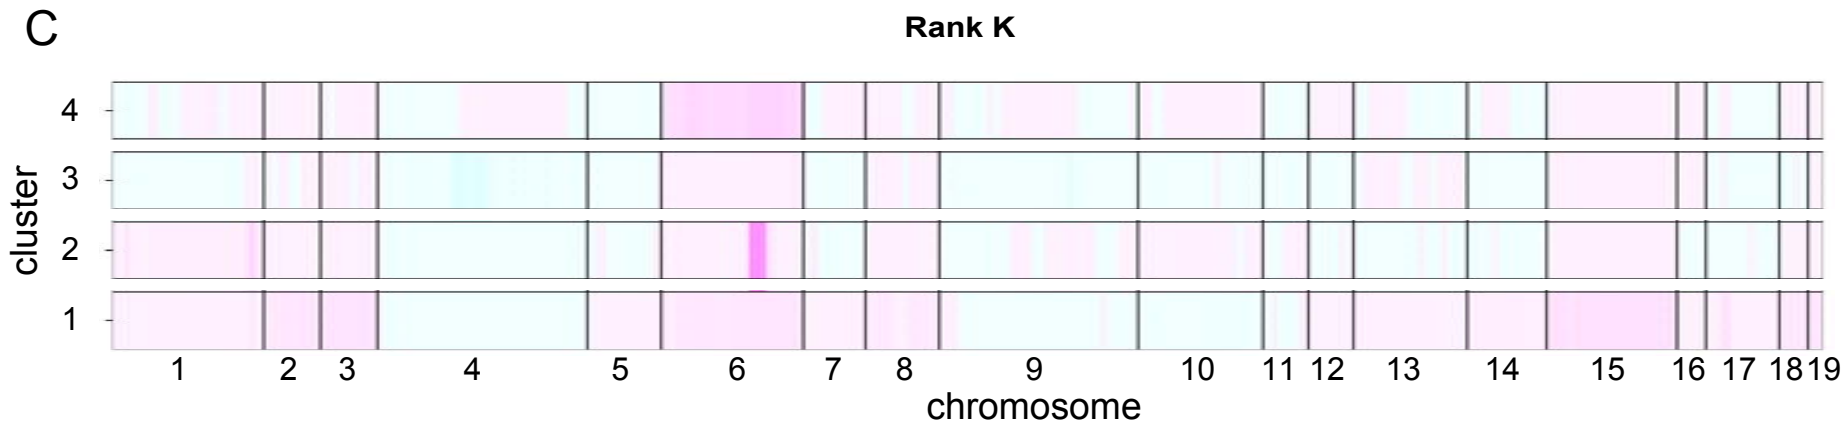

Supplement: pnas_0601273103_4.pdf [file pnas_0601273103_4.pdf]
